# Supplementary material for: Pin1 induces the ADP-induced migration of human dental pulp cells through P2Y1 stabilization
Source: PubMed Central journal article supplement (PMC5356743; doi:10.18632/oncotarget.13377), 2016-11-16
Supplement: oncotarget-07-85381-s001.pdf [file oncotarget-07-85381-s001.pdf]

## Pin1 induces the ADP-induced migration of human dental pulp cells through P2Y1 stabilization

### SUPPLEMENTARY FIGURE

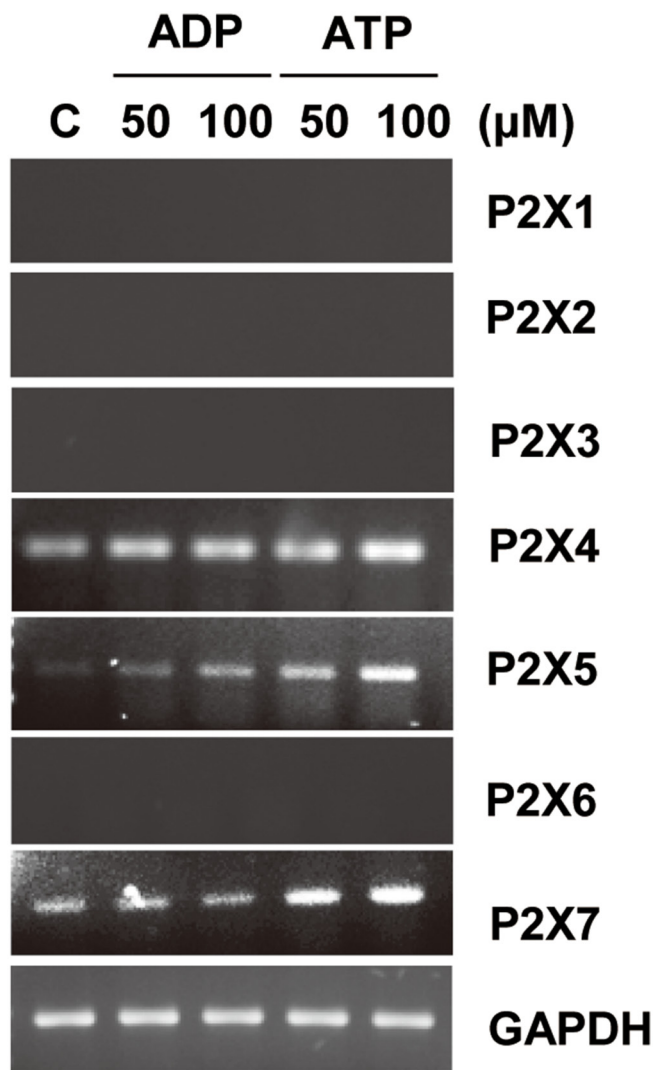

**Supplementary Figure 1: Expression of P2Xs gene family in hDPCs.** Cells were treated with ADP or ATP for 24 h. RT-PCR was performed using primers as described in Table1. GAPDH was used as an internal control.
